# Supplementary material
Source: PubMed Central journal article supplement (PMC10262720)
Supplement: ptc-2020-0134_appendix2.pdf [file ptc-2020-0134_appendix2.pdf]

**Online Supplementary Table 1** Papers That Met Inclusion Criteria

| Citation number | Reference [number]             | Year | Country of origin | Study population                    | Methodology/ Study design | Measurement instrument                                                                                                                                                                                                                                                                                                                                                                      | Domain | Subdomain | Secondary measurement instruments                                                                                                                                                                                                                                                                                                          |
|-----------------|--------------------------------|------|-------------------|-------------------------------------|---------------------------|---------------------------------------------------------------------------------------------------------------------------------------------------------------------------------------------------------------------------------------------------------------------------------------------------------------------------------------------------------------------------------------------|--------|-----------|--------------------------------------------------------------------------------------------------------------------------------------------------------------------------------------------------------------------------------------------------------------------------------------------------------------------------------------------|
| 1               | Baier et al. 2016. [33]        | 2016 | Germany           | n = 200, Cancer                     | Longitudinal              | Resilience Scale (11-item); European Organization for Research and Treatment of Cancer Quality of Life Questionnaire                                                                                                                                                                                                                                                                        | 1,2    | 2,4       | Comprehensive Geriatric Assessment; ADL/IADL; Barthel Index; Karnofsky Index; CCI; "Get Up and Go Test"; MMSE; Mini Nutritional Assessment; Physiologic and Operative Severity Score for the endMeration of Mortality and Morbidity; Tumour stage; Post-operative resection status; Marital status; Number of children; Housing situation. |
| 2               | Barma et al. 2016. [34]        | 2016 | United Kingdom    | n = 3,723, Inpatient rehabilitation | Longitudinal              | C-reactive protein                                                                                                                                                                                                                                                                                                                                                                          | 1      | 4         | GFR; Albumin and hemoglobin levels; Prescription data; Barthel index; Length of stay; Age; Gender; Comorbidities.                                                                                                                                                                                                                          |
| 3               | Best et al. 2015. [47]         | 2015 | Canada            | n = 199, Fallers                    | Prospective cohort        | Executive function measured by 1) Stroop test, 2) Trail Making Test, 3) Backwards digit span, 4) F-A-S Test, 5) Digit Symbol Substitution Test.                                                                                                                                                                                                                                             | 1      | 4         | Functional comorbidity index; MMSE; Physiological Profile Assessment; 4-metre walk test; IADL; International Physical Activity Questionnaire short form; GDS; Age; Sex; Education; Residential status. Demographics; St. George's Respiratory Questionnaire.                                                                               |
| 4               | Cannon et al. 2018. [56]       | 2018 | Australia         | n = 159, COPD                       | Cross-sectional           | Connor-Davidson Resilience Scale; Acceptance of Disease and Impairments Questionnaire; Pulmonary Rehabilitation Benefits and Consequences Scale;                                                                                                                                                                                                                                            | 1,2    | 2,3,4     |                                                                                                                                                                                                                                                                                                                                            |
| 5               | Colón-Emeric et al. 2019. [45] | 2019 | US                | n = 727, Hip fracture               | Longitudinal              | Compilation of 10 outcomes: Self-reported ambulatory status; Instrumental Activities of Daily Living (IADL); Lower extremity physical activities of daily living (LPADL); Yale Physical Activity Scale; Gait speed; Balance via Short Physical Performance Battery or Tinetti Gait and Balance Test; Grip strength; Timed single chair stand; Lower Extremity Gain Scale; Activity monitor. | 1,2    | 2,4       | Demographics; Psychosocial characteristics; Comorbidities; Physical stressor type; Rehabilitation type.                                                                                                                                                                                                                                    |
| 6               | Cristiancho et al. 2016. [35]  | 2016 | US                | n = 430, Fracture                   | Longitudinal              | Montgomery-Asberg Depression Rating Scale; Functional Recovery Score                                                                                                                                                                                                                                                                                                                        | 1,2    | 2,4       | Structured Clinical Interview for DSM-IV disorders; Use of assistive devices; Type of fracture and implant; Pain; Geriatric Adverse Life Events Scale; Duke Social Support Index; State-Trait Anxiety Inventory; Short Blessed Test; Delirium Rating Scale; CIRS; Place of residence.                                                      |
| 7               | Duan-Porter et al. 2016. [36]  | 2016 | US                | n = 641, Cancer                     | Longitudinal              | SF-36                                                                                                                                                                                                                                                                                                                                                                                       | 1,2    | 2,4       | Self-efficacy; Social support for exercise; Hospitalizations; Age; Sex; Race; Educational status; Annual income; Years since cancer diagnosis; Comorbidities; BMI; Current smoking.                                                                                                                                                        |

(Continued)

Online Supplementary Table 1 (Continued)

| Citation number | Citation [reference number] | Year | Country of origin | Study population                   | Methodology/ Study design  | Measurement instrument                                                                                                                                                                | Domain | Subdomain | Secondary measurement instruments                                                                                                                                                                                                                                                                                                                                                                                                                                                                    |
|-----------------|-----------------------------|------|-------------------|------------------------------------|----------------------------|---------------------------------------------------------------------------------------------------------------------------------------------------------------------------------------|--------|-----------|------------------------------------------------------------------------------------------------------------------------------------------------------------------------------------------------------------------------------------------------------------------------------------------------------------------------------------------------------------------------------------------------------------------------------------------------------------------------------------------------------|
| 8               | Edward et al. 2016. [37]    | 2016 | Australia         | n = 51, Cardiac                    | Longitudinal               | CD-RISC, SF-12                                                                                                                                                                        | 1,2    | 2,4       | Patient Health Questionnaire; Brief Medication Questionnaire; Gender; Age; Hypertension; Tobacco use; Raised blood glucose; Physical activity; Diet; Cholesterol/lipid levels; Weight; Survival.                                                                                                                                                                                                                                                                                                     |
| 9               | Goodbrand et al. 2017. [38] | 2017 | United Kingdom    | n = 2797, Inpatient rehabilitation | Longitudinal               | Bisphosphonate use                                                                                                                                                                    | 1      | 4         | Barthel Index; Age; Sex; Hospitalizations; Diagnosis; GFR; Serum calcium; Serum albumin; Prescribed calcium and vitamin D supplementation; Prescribing info; Biochemistry and hematology results; Date of death.                                                                                                                                                                                                                                                                                     |
| 10              | Hägglund et al. 2008. [54]  | 2008 | Sweden            | n = 49, Cardiac                    | Cross-sectional            | Resilience Scale (25 items)                                                                                                                                                           | 1,2    | 2,4       | SF-36; Social Provision Scale; GDS-15; Age; Gender; Single living; "General fatigue" in MFI-20.                                                                                                                                                                                                                                                                                                                                                                                                      |
| 11              | Hurría et al. 2019. [63]    | 2019 | US                | n = 256; Breast Cancer             | Prospective clinical trial | Return to within 10 points of their prechemotherapy European Organization for Research and Treatment of Cancer Quality of Life Questionnaire physical function subscale at 12 months. | 1,2    | 2,4       | Demographics; Tumor information; Physical Health Section-Subscale of Older American Resources and Services; Medical Outcomes Study Social Support Survey; Hospital Anxiety and Depression Scale; Blessed Orientation-Memory-Concentration test; FIM; Length of stay; Discharge destination; Mortality; Gender; Age; Marital status; Non-English speaking background; Home living environment; Admission diagnosis; Comorbidities; Medication use; MMSE; Rowland Universal Dementia Assessment Scale. |
| 12              | Kohler et al. 2017. [39]    | 2017 | Australia         | n = 29, Fracture                   | Longitudinal               | CD-RISC                                                                                                                                                                               | 1,2    | 2,4       | New York Heart Association classification; Society of Thoracic Surgery risk index; Frailty assessment (grip strength, slow gait); Center for Epidemiological Studies Depression Scale; Unintended weight loss; Physical Activity Scale for the Elderly; Adverse events post-surgery including rehospitalization and deaths; Duke Activity Status Index; SF-12.                                                                                                                                       |
| 13              | Kotajarvi et al. 2017. [40] | 2017 | US                | n = 103, Cardiac                   | Longitudinal               | Not explicitly defined; <i>resilience</i> used as key word and in discussion; frailty potentially.                                                                                    | 1,2    | 2,4       | Age; Gender; BMI; Blood pressure; Heart rate; Medical history; Medication use; CIRS; Mortality.                                                                                                                                                                                                                                                                                                                                                                                                      |
| 14              | Lagro et al. 2014. [48]     | 2014 | Netherlands       | n = 238, Fallers                   | Retrospective cohort       | Not explicitly defined; <i>resilience</i> as key word linked to physical function; potential for blood pressure recovery pattern.                                                     | 1      | 4         | Age; Sex; Medical history; Fracture type; Surgical treatment; Duration of surgery; CIRS, ADL/IADL; C-reactive protein; Hemoglobin level; Serum creatinine; Estimated creatinine clearance; Serum albumin; Cockcroft creatinine clearance; Albumin value; Procalcitonin concentrations; Soluble CD14s and neopterin; Soluble factors IFN-inducible protein 10 and IL-6.                                                                                                                               |
| 15              | Larsen et al. 2017. [41]    | 2017 | France            | n = 102, Fracture                  | Longitudinal               | Host immunity; heparinized blood samples; neopterin as a prognostic biomarker.                                                                                                        | 1      | 4         |                                                                                                                                                                                                                                                                                                                                                                                                                                                                                                      |

(Continued)

Online Supplementary Table 1 (Continued)

| Citation number | Citation [reference number]  | Year | Country of origin | Study population                                   | Methodology/ Study design | Measurement instrument                         | Domain | Subdomain | Secondary measurement instruments                                                                                                                                                                                                                                                                         |
|-----------------|------------------------------|------|-------------------|----------------------------------------------------|---------------------------|------------------------------------------------|--------|-----------|-----------------------------------------------------------------------------------------------------------------------------------------------------------------------------------------------------------------------------------------------------------------------------------------------------------|
| 16              | Lee et al. 2020. [57]        | 2020 | Taiwan            | n = 267; Cardiovascular disease and Sarcopenia     | Cross-sectional           | Resilience Scale (25 items)                    | 1,2    | 2,4       | Demographics; Exercise; Cardiovascular disease status.                                                                                                                                                                                                                                                    |
| 17              | Lim et al. 2019. [46]        | 2019 | Singapore         | n = 152, Hip Fracture                              | Longitudinal              | SF-36; Connor-Davidson Resilience Scale        | 1,2    | 2,4       | Demographics; Comorbidity; Fracture characteristics; Falls.                                                                                                                                                                                                                                               |
| 18              | Mehra et al. 2008. [42]      | 2008 | USA               | n = 105, Moderate disability (defined by the SPPB) | Longitudinal              | Hardy-Gill Resilience Scale                    | 1,2    | 2,4       | SPPB; MMSE; Age; Gender; Race; Marital status; GDS; National Health Interview Survey with ADL/IADL; Short Version Apathy Scale; Co-morbidity Disease Index                                                                                                                                                |
| 19              | Milte et al. 2015. [61]      | 2015 | Australia         | n = 136, Frailty                                   | Randomized trial          | Multidimensional Health Locus of Control scale | 1,2    | 2,4       | Sociodemographic; Admission diagnosis; Length of stay; MMSE; Inter RAI Post-Acute Care (interRAI PAC); Changes in Health; End-stage disease; Signs and Symptoms scale; ADL; EQ-5D; GDS; Modified Barthel Index; Care Transition Measure                                                                   |
| 20              | Morete et al. 2018. [58]     | 2018 | Brazil            | n = 108, Pain                                      | Cross-sectional           | Connor-Davidson Resilience Scale               | 1,2    | 2,4       | Geriatric Depression Scale; SF-36; Mini Mental State Instrument                                                                                                                                                                                                                                           |
| 21              | Musich et al. 2019. [59]     | 2019 | US                | n = 3,824, Pain                                    | Cross-sectional           | Brief Resilience Scale;                        | 1,2    | 2,4       | Pain-related survey; PEG assessment scale; Veterans Rand-12; National Drug Codes; Patient Health Questionnaire-2; Pittsburgh Sleep Quality Index; Multidimensional Health Locus of Control (MHLC); Social Network Index; Demographics                                                                     |
| 22              | Rebagliati et al. 2016. [49] | 2016 | Italy             | n = 81, Frail and Hip or knee surgery              | Prospective cohort        | Resilience Scale (10 items)                    | 1,2    | 2,4       | MMSE; Age, Gender, Living arrangement; Health; Nutrition; Cognitive status; Multidimensional Prognostic Index; ADL/IADL; Mini-Nutritional Assessment; CIRS; Extol-Smith Scale; Short Portable Mental Status Questionnaire; Number of drugs used; Cohabitation status; WHO Quality of Life-BRIEF; GDS; FIM |
| 23              | Resnick et al. 2011. [50]    | 2011 | US                | n = 200, Fracture                                  | Prospective cohort        | Resilience Scale (14 items)                    | 1,2    | 2,4       | CCI; BMI; Yale Physical Activity Survey; ActiGraph                                                                                                                                                                                                                                                        |
| 24              | Resnick et al. 2016. [55]    | 2016 | US                | n = 89, Pain                                       | Cross-sectional           | Physical Resilience Scale                      | 1,2    | 2,4       | Mini-Cog; Age; Sex; Race; Marital status; Education; Traumatic event; Admission dates; Orthopedic diagnosis; CCI; Length of stay; Barthel Index; Physical Activity for Longterm Care Survey; Pain Verbal Descriptor Scale; Delirium-O-Meter; Medication use                                               |

(Continued)

| Citation number | Citation [reference number] | Country of origin | Year | Study population                            | Methodology/ Study design       | Measurement instrument                                                                                                                                                                                                                                                                                                                                                                | Domain | Subdomain | Secondary measurement instruments                                                                                                                                                                                                                                                                                                                                                                                           |
|-----------------|-----------------------------|-------------------|------|---------------------------------------------|---------------------------------|---------------------------------------------------------------------------------------------------------------------------------------------------------------------------------------------------------------------------------------------------------------------------------------------------------------------------------------------------------------------------------------|--------|-----------|-----------------------------------------------------------------------------------------------------------------------------------------------------------------------------------------------------------------------------------------------------------------------------------------------------------------------------------------------------------------------------------------------------------------------------|
| 25              | Resnick et al. 2016. [62]   | US                | 2016 | n = 89, Fracture or other orthopedic trauma | Randomized trial                | Physical Resilience Scale                                                                                                                                                                                                                                                                                                                                                             | 1,2    | 2,4       | Mini-Cog; Age; Gender; Race; Marital status; Education; Traumatic event; Admission diagnosis; Course between trauma and admission; CCI; Discharge location; Adverse events; Barthel Index; Physical Performance and Mobility Examination; Physical Activity Survey; Function Focused Care Behaviour Checklist for Patients; Actigraphy; GDS; Pain Verbal Descriptor Scale; Delirium-O-Meter; Fear of Falling questionnaire. |
| 26              | Resnick et al. 2018. [51]   | US                | 2018 | n = 258; Hip fracture                       | Prospective cohort              | Resilience Scale (25 items)                                                                                                                                                                                                                                                                                                                                                           | 1,2    | 2,4       | Demographics; Modified Mini-Mental State Exam; Number of pain regions; Dual-energy X-ray absorptiometry; Yale Physical Activity Survey; Lower Extremity Gain Scale; Short Physical Performance Battery; Grip strength;                                                                                                                                                                                                      |
| 27              | Resnick et al. 2019. [52]   | US                | 2019 | n = 172; Hip fracture                       | Prospective cohort              | Resilience Scale (25 items)                                                                                                                                                                                                                                                                                                                                                           | 1,2    | 2,4       | Demographics; Modified Mini Mental Status Exam; Comorbidities; Social activities; Blood sample for DNA; Areas of pain and Numeric Rating Scale; Physical and Instrumental Activities of Daily Living; Lower Extremity Gains Score; Short Physical Performance Battery; Grip Strength; Yale Physical Activity Scale.                                                                                                         |
| 28              | Sadler et al. 2017. [64]    | United Kingdom    | 2017 | n = 38, Stroke                              | Experimental                    | Brief Resilience Scale; Quality Of Life                                                                                                                                                                                                                                                                                                                                               | 1,2    | 2,4       | SF-12; Frenchay Activities Index; Hospital Anxiety and Depression Scale.                                                                                                                                                                                                                                                                                                                                                    |
| 29              | Sciumè et al. 2018. [53]    | Italy             | 2018 | n = 80; Orthopedic surgery                  | Prospective cohort              | Resilience Scale                                                                                                                                                                                                                                                                                                                                                                      | 1,2    | 2,4       | Demographics; Multidimensional Prognostic Index; Functional Independence Measure (FIM); World Health Organization Quality of Life-BREF (WHOQOL-BREF).                                                                                                                                                                                                                                                                       |
| 30              | Wahl et al. 1999. [43]      | Germany           | 1999 | n = 168, Visually impaired                  | Longitudinal                    | Psychological resilience in context of ADL/ADL                                                                                                                                                                                                                                                                                                                                        | 1,2    | 2,4       | MMSE; Older Americans Resources and Services questionnaire for use of outdoor resources; ADL/ADL; Philadelphia Geriatric Center Morale Scale.                                                                                                                                                                                                                                                                               |
| 31              | Wister et al. 2018. [24]    | Canada            | 2018 | n = 6771, Multimorbidity                    | Baseline data from Longitudinal | Multimorbidity resilience index (additive index comprised of summary performance score, Older Americans Resources and Services scale, Diener Satisfaction with Life Scale, Center for Epidemiological Studies Depression Scale, Kessler Psychological Distress Scale, Medical Outcomes Study Social Support Survey, Ordinal resilience index items, Loneliness, Social participation) | 1,2,3  | 2,3,4     | Demographics; Emergency room visits/Hospital stays; Perceived health; Sleep quality; Comorbidities; Activity level; Alcohol consumption; Pain.                                                                                                                                                                                                                                                                              |

(Continued)

**Online Supplementary Table 1** (Continued)

| Citation [reference number]    | Year | Country of origin | Study population          | Methodology/ Study design       | Measurement instrument                                                                                                                                                                                                                                                                                                                                                       | Domain | Subdomain | Secondary measurement instruments                                                                          |
|--------------------------------|------|-------------------|---------------------------|---------------------------------|------------------------------------------------------------------------------------------------------------------------------------------------------------------------------------------------------------------------------------------------------------------------------------------------------------------------------------------------------------------------------|--------|-----------|------------------------------------------------------------------------------------------------------------|
| 32 Wister et al. 2019. [60]    | 2019 | Canada            | n = 6,771, Multimorbidity | Baseline data from Longitudinal | Total resilience index (additive index comprised of summary performance score, Older Americans Resources and Services scale, Diener Satisfaction with Life Scale, Center for Epidemiological Studies Depression Scale, Kessler Psychological Distress Scale, Medical Outcomes Study Social Support Survey, Ordinal resilience index items, Loneliness, Social participation) | 1,2,3  | 2,3,4     | Demographics; Activity level; Alcohol consumption; Pain.                                                   |
| 33 Zimmerman et al. 1999. [44] | 1999 | US                | n = 272, Fracture         | Longitudinal                    | Center for Epidemiological Studies Depression Scale                                                                                                                                                                                                                                                                                                                          | 1,2    | 2,4       | Functional Status Index; Older Americans Resources and Services Instrument; Social functioning; MMSE; CCI. |

ADL = Activities of Daily Living; BMI = Body Mass Index; CCI = Charlson Comorbidity Index; CD-RISC = Connor-Davidson Resilience Scale; CIRB = Cumulative Illness Rating Scale; EQ-5D = EuroQol 5 Dimension; GDS = Geriatric Depression Scale; FIM = Functional Independence Measure; GFR = Glomerular Filtration Rate; IADL = Instrumental Activities of Daily Living; MMSE = Mini Mental State Examination; SF-12 = Short-Form Health Survey (12-item version); SF-36 = Short-Form Health Survey (36-item version); SPPB = Short Physical Performance Battery; QOL = Quality of Life.

Domain: (1) = body function or structure (signs or symptoms, biomarkers, etc.); (2) activity and participation (quality of life, etc.); and (3) societal impact of the pathology.  
 Subdomain: (1) death, (2) life, (3) resource use or economic impact, (4) pathophysiological manifestations.
